# Supplementary material for: Health and Welfare Outcomes for Adolescents Following Release from Prison in Queensland, Australia: A Prospective Cohort Study
Source: MDPI journal article supplement (doi:10.3390/adolescents1020014), 2021-05-12
Supplement: s1 [file s1]

**Supplementary Table S1: Covariate definitions.**

| Co-variate                                        | Source             | Definition (exposed vs. unexposed)                                                                                                                                       |
|---------------------------------------------------|--------------------|--------------------------------------------------------------------------------------------------------------------------------------------------------------------------|
| <b><i>Socio-demographic</i></b>                   |                    |                                                                                                                                                                          |
| Sex                                               | Survey             | Male vs. female                                                                                                                                                          |
| Indigenous status                                 | Survey             | Indigenous vs. non-Indigenous                                                                                                                                            |
| Education                                         | Survey             | <10 years schooling vs. ≥10 years schooling                                                                                                                              |
| Relationship status                               | Survey             | Single/divorced/widowed vs. married/de facto                                                                                                                             |
| <b><i>Socio-economic</i></b>                      |                    |                                                                                                                                                                          |
| Housing stability                                 | Survey             | Unstable housing (homeless, residing in boarding house or with friends) vs. stable housing (renting, owner or residing with parents)                                     |
| Employment                                        | Survey             | No employment in 6 months prior to incarceration vs. any employment                                                                                                      |
| Living in poverty                                 | Survey & MIAESR(1) | Income in 4 weeks before incarceration below poverty line(1) according to Australian standard, (accounting for dependents and marital status) vs. above the poverty line |
| Outstanding debts<br>(to be settled post-release) | Survey             | Yes vs. no                                                                                                                                                               |
| <b><i>Criminal justice</i></b>                    |                    |                                                                                                                                                                          |
| Prior adult incarceration                         | Survey             | Yes vs. no                                                                                                                                                               |
| Juvenile detention                                | Survey             | Yes vs. no                                                                                                                                                               |
| Illegal income                                    | Survey             | Income from illegal activities in the 4 weeks prior to imprisonment vs. no illegal income                                                                                |
| Incarceration length                              | QCS records        | Time spent in prison (index incarceration) ≥6 months vs. < 6 months                                                                                                      |
| Drug-related incarceration                        | QCS records        | Index incarceration for a drug-related offence vs. no drug related offence                                                                                               |
| Parole status on release                          | QCS records        | Released to parole supervision vs freedom                                                                                                                                |
| <b><i>Substance use</i></b>                       |                    |                                                                                                                                                                          |
| Alcohol drinking                                  | Survey             | Score ≥16 on the AUDIT(2) indicating high risk and possible dependent alcohol drinking prior to index incarceration vs. score <16                                        |
| Tobacco use                                       | Survey             | Score ≥4 on the ASSIST(3) indicating moderate to high tobacco use in 3 months prior to index incarceration vs. score <4                                                  |

|                                                                                |                              |                                                                                                                                                                      |
|--------------------------------------------------------------------------------|------------------------------|----------------------------------------------------------------------------------------------------------------------------------------------------------------------|
| Cannabis use                                                                   | Survey                       | Score $\geq 4$ on the ASSIST(3) indicating moderate to high cannabis use in 3 months prior to index incarceration vs. score $< 4$                                    |
| Amphetamine use                                                                | Survey                       | Score $\geq 4$ on the ASSIST(3) indicating moderate to high amphetamine use in 3 months prior to index incarceration vs. score $< 4$                                 |
| Opioid use                                                                     | Survey                       | Score $\geq 4$ on the ASSIST(3) indicating moderate to high opioid use in 3 months prior to index incarceration vs. score $< 4$                                      |
| History of sharing needles/drug-injecting equipment ever                       | Survey                       | Yes vs. no                                                                                                                                                           |
| History of sharing needles/drug-injecting equipment during index incarceration | Survey                       | Yes vs. no                                                                                                                                                           |
| <b><i>Mental health</i></b>                                                    |                              |                                                                                                                                                                      |
| Self-harm or suicide attempts                                                  | Survey                       | Lifetime history - yes vs. no                                                                                                                                        |
| Psychological distress                                                         | Survey                       | Score of $\geq 22$ was measured using the K10(4) indicating high/very high psychological distress vs score $< 22$                                                    |
| CNS medication use                                                             | QCS health records           | A proxy for current mental health disorder - yes vs. no                                                                                                              |
| Intellectual disability                                                        | Survey                       | Score $< 84.5$ on the Hayes Ability Screening Index,(5) attended a special school, and/or had previously been diagnosed with an intellectual disability – yes vs. no |
| <b><i>Physical health</i></b>                                                  |                              |                                                                                                                                                                      |
| Hepatitis C                                                                    | QCS health records or survey | Ever tested positive for Hepatitis C – yes vs. no                                                                                                                    |
| Sexually transmitted infection                                                 | Survey                       | Prior diagnosis of sexually transmitted infection – yes vs. no                                                                                                       |
| Tattooed in prison                                                             | Survey                       | Yes vs. no                                                                                                                                                           |
| Chronic disease                                                                | Survey                       | Ever been diagnosed with one or more of the following: asthma, high blood pressure, high cholesterol, heart disease, diabetes, epilepsy or cancer - yes vs. no       |
| Patient activation measure (PAM)                                               | Survey                       | Score $\leq 55.1$ on the on the Patient Activation Measure 2(6) identifying poor self-reported physical health as 1 standard deviation below the mean vs $> 55.1$    |
| Physical health (sf36)                                                         | Survey                       | Score $\leq 44.8$ on the Short Form 36 Health Survey version 2(6) identifying poor self-reported physical health as 1 standard deviation below the mean vs $> 44.8$  |
| <b><i>Social/reintegration support</i></b>                                     |                              |                                                                                                                                                                      |

|                                      |                    |                                                                                                                     |
|--------------------------------------|--------------------|---------------------------------------------------------------------------------------------------------------------|
| Visits in prison                     | Survey             | Visits in prison from community contacts in the past 4 weeks - no vs. yes                                           |
| Perceived social support             | Survey             | Score $\leq 18$ on the Enriched Social Support Inventory (ESSI)(7) indication low perceived social support vs $>18$ |
| Separation from family as a child    | Survey             | Self-reported removal from family as child – yes vs. no                                                             |
| Transitional support                 | Survey             | Transitional support from QCS - none or only pre-release vs. pre-and post-release                                   |
| <b><i>Passports intervention</i></b> | Researcher records | Control group (no intervention) vs. intervention (assistance with health services utilisation post-release)         |

---

**Supplementary Table S2. Baseline characteristics according to age (N=1181).**

| <b>Baseline covariate</b>                    | <b>Adolescents<br/>(n=298)<br/>Number (%)</b> | <b>Adults<br/>(n=883)<br/>Number (%)</b> | <b>p-value</b> |
|----------------------------------------------|-----------------------------------------------|------------------------------------------|----------------|
| <b><i>Socio-demographic</i></b>              |                                               |                                          |                |
| Sex (female)                                 | 58 (19.5)                                     | 182 (20.6)                               | 0.670          |
| Indigenous                                   | 94 (31.5)                                     | 193 (21.9)                               | 0.001          |
| <10 years schooling                          | 143 (48.0)                                    | 364 (41.4)                               | 0.048          |
| Not married/defacto                          | 212 (71.1)                                    | 551 (62.4)                               | 0.006          |
| <b><i>Socio-economic</i></b>                 |                                               |                                          |                |
| Unstable housing                             | 59 (19.8)                                     | 178 (20.2)                               | 0.893          |
| Unemployed                                   | 163 (54.7)                                    | 461 (52.2)                               | 0.457          |
| Living below poverty line                    | 133 (44.8)                                    | 423 (48.0)                               | 0.335          |
| Debts to be settled post-release             | 204 (68.7)                                    | 569 (64.5)                               | 0.190          |
| <b><i>Criminal justice</i></b>               |                                               |                                          |                |
| Prior adult incarceration                    | 178 (59.7)                                    | 596 (67.7)                               | 0.013          |
| Prior juvenile detention                     | 95 (32.8)                                     | 219 (24.9)                               | 0.009          |
| Illegal income prior to index incarceration  | 79 (26.5)                                     | 167 (19.0)                               | 0.006          |
| Incarceration ≥6 months                      | 130 (43.6)                                    | 387 (43.8)                               | 0.951          |
| Drug-related sentence                        | 88 (29.7)                                     | 267 (30.2)                               | 0.869          |
| Parole status on release                     | 127 (42.6)                                    | 319 (36.1)                               | 0.046          |
| <b><i>Substance use</i></b>                  |                                               |                                          |                |
| High risk drinking                           | 147 (50.3)                                    | 271 (31.4)                               | <0.001         |
| Risky tobacco use                            | 268 (90.2)                                    | 677 (67.7)                               | <0.001         |
| Risky cannabis use                           | 173 (58.3)                                    | 370 (41.9)                               | <0.001         |
| Risky amphetamine use                        | 127 (42.8)                                    | 324 (36.7)                               | 0.065          |
| Risky opioid use                             | 53 (17.8)                                     | 198 (22.4)                               | 0.091          |
| Shared needles/injecting equipment ever      | 53 (17.9)                                     | 226 (25.6)                               | 0.006          |
| Shared needles/inject equip current          | 33 (11.1)                                     | 94 (10.7)                                | 0.832          |
| <b><i>Mental health</i></b>                  |                                               |                                          |                |
| Self-harm/attempted suicide history          | 77 (25.8)                                     | 243 (27.5)                               | 0.572          |
| CNS medications                              | 60 (22.6)                                     | 272 (32.6)                               | 0.002          |
| High/Very high K10 score                     | 77 (25.8)                                     | 224 (25.4)                               | 0.888          |
| Intellectual disability                      | 114 (38.4)                                    | 251 (29.0)                               | 0.003          |
| <b><i>Physical health</i></b>                |                                               |                                          |                |
| Hepatitis C positive                         | 64 (39.3)                                     | 285 (57.2)                               | <0.001         |
| STI history                                  | 79 (26.5)                                     | 242 (27.4)                               | 0.764          |
| Prison tattoo ever                           | 45 (15.1)                                     | 195 (22.1)                               | 0.010          |
| ≥1 chronic disease(s)                        | 133 (44.6)                                    | 521 (59.0)                               | <0.001         |
| Poor physical health (SF36)                  | 14 (4.8)                                      | 142 (16.2)                               | <0.001         |
| Low activation (PAM)                         | 75 (25.4)                                     | 164 (18.7)                               | 0.013          |
| <b><i>Social/transitional support</i></b>    |                                               |                                          |                |
| No visits in previous 4 weeks                | 156 (52.4)                                    | 471 (53.3)                               | 0.767          |
| Low perceived social support                 | 57 (19.2)                                     | 206 (23.4)                               | 0.136          |
| Separated from family as a child             | 66 (22.2)                                     | 164 (18.6)                               | 0.294          |
| No pre and post-release transitional support | 272 (91.6)                                    | 754 (85.4)                               | 0.006          |
| <b><i>No Passports intervention</i></b>      | <b>149 (50.0)</b>                             | <b>443 (50.2)</b>                        | <b>0.960</b>   |

**Supplementary Table S3. Baseline covariates in reduced adjusted regression models.**

| Baseline covariates                               | Outcomes         |            |         |                              |                |                             |                              |                       |              |              |            |             |
|---------------------------------------------------|------------------|------------|---------|------------------------------|----------------|-----------------------------|------------------------------|-----------------------|--------------|--------------|------------|-------------|
|                                                   | Unstable housing | Unemployed | Poverty | Low perceived social support | Low activation | High psychological distress | High risk/dependent drinking | Daily tobacco smoking | Cannabis use | ATS drug use | Unsafe sex | No GP visit |
| Sex (female)                                      | ✓                | -          | -       | -                            | -              | ✓                           | -                            | -                     | -            | ✓            | -          | ✓           |
| Indigenous                                        | ✓                | -          | -       | -                            | -              | ✓                           | -                            | ✓                     | -            | ✓            | ✓          | -           |
| <10 years schooling                               | -                | ✓          | ✓       | -                            | -              | -                           | -                            | -                     | ✓            | ✓            | -          | -           |
| Not married/defacto                               | -                | ✓          | -       | -                            | ✓              | ✓                           | -                            | -                     | -            | ✓            | ✓          | -           |
| Unstable housing                                  | ✓                | ✓          | -       | ✓                            | -              | -                           | -                            | -                     | ✓            | ✓            | ✓          | -           |
| Unemployed                                        | ✓                | ✓          | ✓       | ✓                            | -              | ✓                           | -                            | ✓                     | ✓            | ✓            | -          | ✓           |
| Living below poverty line                         | -                | ✓          | ✓       | -                            | ✓              | ✓                           | -                            | -                     | -            | -            | ✓          | ✓           |
| Debts to be settled post-release                  | -                | ✓          | -       | ✓                            | -              | ✓                           | -                            | -                     | -            | -            | ✓          | -           |
| Prior adult incarceration                         | -                | -          | ✓       | -                            | ✓              | -                           | -                            | ✓                     | ✓            | ✓            | -          | -           |
| Prior juvenile detention                          | ✓                | -          | -       | ✓                            | ✓              | -                           | -                            | -                     | -            | ✓            | ✓          | ✓           |
| Illegal income prior to index incarceration       | ✓                | -          | ✓       | ✓                            | -              | ✓                           | -                            | ✓                     | -            | -            | -          | -           |
| Incarceration ≥6 months                           | ✓                | -          | -       | -                            | -              | -                           | -                            | -                     | -            | ✓            | -          | ✓           |
| Drug-related sentence                             | -                | ✓          | ✓       | -                            | -              | -                           | ✓                            | ✓                     | ✓            | -            | -          | ✓           |
| Parole status on release                          | ✓                | -          | ✓       | -                            | -              | -                           | -                            | -                     | ✓            | ✓            | -          | -           |
| High risk drinking                                | ✓                | ✓          | ✓       | -                            | ✓              | -                           | ✓                            | -                     | ✓            | -            | -          | ✓           |
| Risky tobacco use                                 | ✓                | -          | ✓       | ✓                            | -              | ✓                           | -                            | ✓                     | ✓            | ✓            | ✓          | -           |
| Risky cannabis use                                | -                | -          | -       | -                            | ✓              | -                           | -                            | -                     | ✓            | ✓            | ✓          | ✓           |
| Risky amphetamine use                             | -                | ✓          | -       | ✓                            | -              | -                           | ✓                            | -                     | -            | ✓            | -          | ✓           |
| Risky opioid use                                  | -                | -          | ✓       | ✓                            | -              | ✓                           | -                            | ✓                     | -            | -            | ✓          | ✓           |
| Shared needles/injecting equipment ever           | -                | -          | ✓       | ✓                            | -              | ✓                           | -                            | -                     | ✓            | -            | ✓          | -           |
| Shared needles/inject equip current incarceration | ✓                | ✓          | -       | -                            | -              | ✓                           | -                            | -                     | ✓            | ✓            | ✓          | ✓           |
| Self-harm/attempted suicide history               | -                | -          | -       | ✓                            | ✓              | ✓                           | ✓                            | -                     | ✓            | -            | -          | -           |
| CNS medications                                   | -                | ✓          | ✓       | -                            | ✓              | -                           | -                            | ✓                     | -            | ✓            | ✓          | ✓           |
| High/Very high psychological distress (K10)       | -                | ✓          | ✓       | -                            | -              | ✓                           | -                            | ✓                     | ✓            | -            | -          | ✓           |
| Intellectual disability                           | ✓                | ✓          | -       | -                            | ✓              | -                           | -                            | ✓                     | ✓            | ✓            | ✓          | -           |
| Hepatitis C positive                              | -                | ✓          | ✓       | -                            | ✓              | ✓                           | ✓                            | -                     | ✓            | ✓            | ✓          | ✓           |
| STI history                                       | ✓                | ✓          | ✓       | -                            | ✓              | ✓                           | -                            | -                     | ✓            | ✓            | -          | -           |
| Prison tattoo ever                                | ✓                | ✓          | -       | ✓                            | -              | -                           | ✓                            | -                     | -            | ✓            | ✓          | ✓           |
| ≥1 chronic disease(s)                             | ✓                | ✓          | ✓       | ✓                            | -              | ✓                           | -                            | -                     | ✓            | -            | ✓          | ✓           |
| Poor physical health (SF36)                       | -                | ✓          | -       | -                            | ✓              | ✓                           | -                            | ✓                     | -            | ✓            | ✓          | ✓           |
| Low activation (PAM)                              | -                | ✓          | ✓       | ✓                            | ✓              | -                           | ✓                            | -                     | -            | -            | ✓          | ✓           |
| No visits in previous 4 weeks                     | ✓                | -          | -       | ✓                            | -              | -                           | ✓                            | -                     | -            | ✓            | ✓          | -           |
| Low perceived social support                      | -                | ✓          | ✓       | ✓                            | ✓              | ✓                           | ✓                            | -                     | -            | -            | ✓          | ✓           |
| Taken from family as a child                      | -                | -          | -       | -                            | -              | -                           | ✓                            | -                     | -            | -            | -          | -           |
| No pre and post-release reintegration support     | ✓                | -          | -       | -                            | ✓              | ✓                           | ✓                            | -                     | ✓            | ✓            | -          | -           |
| No Passports intervention                         | -                | -          | -       | -                            | ✓              | ✓                           | -                            | ✓                     | -            | ✓            | ✓          | ✓           |

## References

1. MIAESR. Poverty lines: Australia Australia2014 [Available from: <https://melbourneinstitute.com/miaesr/publications/indicators/poverty-lines-australia.html>].
2. Babor TF, Higgins-Biddle JC, Saunders JB, Monteiro MG. AUDIT: The Alcohol Use Disorders Identification Test, Guidelines for Use in Primary Care (2nd Ed). Geneva: World Health Organisation (WHO); 2001.
3. Humeniuk RE, Henry - Edwards S, Ali RL, Poznyak V, Monteiro M. The Alcohol, Smoking and Substance Involvement Screening Test (ASSIST): Manual for Use in Primary Care. Geneva: World Health Organisation; 2010.
4. Kessler RC, Andrews G, Colpe LJ, Hiripi E, Mroczek DK, Normand SLT, et al. Short screening scales to monitor population prevalences and trends in non-specific psychological distress. Psychol Med. 2002;32(6):959-76.
5. Hayes S. Hayes Ability Screening Index (HASI) Manual. Faculty of Medicine, University of Sydney; 2000.
6. Ware J, Kosinski M, Dewey J. How to Score Version Two of the SF-36 Health Survey. Lincoln, RI: Quality Metric Incorporated; 2000.
7. Mitchell PH, Powell L, Blumenthal J, Norten J, Ironson G, Pitula CR, et al. A short social support measure for patients recovering from myocardial infarction: The ENRICHD Social Support Inventory. J Cardiopulm Rehabil. 2003;23(6):398-403.
